# Supplementary material for: Developmental Trajectories of the Orbitofrontal Cortex and Anhedonia in Middle Childhood and Risk for Substance Use in Adolescence in a Longitudinal Sample of Depressed and Healthy Preschoolers
Source: Atypon-hosted journal article supplement (doi:10.1176/appi.ajp.2018.17070777), 2018-03-21

Data Supplement for Luby et al., Developmental Trajectories of the Orbitofrontal Cortex and Anhedonia in Middle Childhood and Risk for Substance Use in Adolescence in a Longitudinal Sample of Depressed and Healthy Preschoolers. *Am J Psychiatry* (doi: 10.1176/appi.ajp.2018.17070777)

## Contents

TABLE S1. Multilevel Models of Orbital Frontal Cortex (OFC) Volume Residuals and OFC Thickness by Time-Varying CDI-C Anhedonia T-Score Covarying for Baseline Anhedonia Severity (N=150)

TABLE S2. General Linear Models of Relationship between Individual Subject Intercepts and Slopes from Multilevel Linear Models (MLM) of Orbital Frontal Cortex (OFC) Volume Residuals and OFC Thickness by Time-Varying CDI-C Anhedonia and Age of Onset of Alcohol or Marijuana Use (N=135)

TABLE S3. Zero-Inflated Poisson Regression Models of Summed Marijuana Use and Alcohol Use ( $\geq 1$  Drink) Frequency Categories by Individual Subject Intercepts and Slopes from Multilevel Linear Models (MLM) of Orbital Frontal Cortex (OFC) Volume Residuals and OFC Thickness by Time-Varying CDI-C Anhedonia (N=135)

TABLE S4. Zero-Inflated Poisson Regression Models of Summed Marijuana Use and Alcohol Use (Intoxication) Frequency Categories by Individual Subject Intercepts and Slopes from Multilevel Linear Models (MLM) of Orbital Frontal Cortex (OFC) Volume Residuals and OFC Thickness by Time-Varying CDI-C Anhedonia (N=135)

TABLE S5. Zero-Inflated Poisson Regression Models of Summed Marijuana Use and Alcohol Use ( $\geq 5$  Drinks) Frequency Categories by Individual Subject Intercepts and Slopes from Multilevel Linear Models (MLM) of Orbital Frontal Cortex (OFC) Volume Residuals and OFC Thickness by Gender and Age at Scan (N=135)

FIGURE S1. Individual Subject Intercepts and Slopes from Multilevel Models of Orbital Frontal Cortex (OFC) Volume Residuals and OFC Thickness by Time-Varying CDI-C Anhedonia T-Score by Marijuana and Alcohol ( $\geq 5$  Drinks) Frequency Category (N=135)

**TABLE S1. Multilevel Models of Orbital Frontal Cortex (OFC) Volume Residuals and OFC Thickness by Time-Varying CDI-C Anhedonia T-Score Covarying for Baseline Anhedonia Severity (N=150)**

| <b>DV: OFC Volume Residuals</b>                 | <b>Estimate</b> | <b>SE</b>     | <b>t</b>      | <b>p</b>          |
|-------------------------------------------------|-----------------|---------------|---------------|-------------------|
| Intercept                                       | -0.0485         | 0.2289        | -0.21         | 0.8326            |
| <b>Age at scan</b>                              | <b>-0.1032</b>  | <b>0.0322</b> | <b>-3.21</b>  | <b>0.0018</b>     |
| <b>Age at scan squared</b>                      | <b>-0.0249</b>  | <b>0.0121</b> | <b>-2.05</b>  | <b>0.0419</b>     |
| Male gender                                     | 0.0264          | 0.2968        | 0.09          | 0.9291            |
| Baseline anhedonia severity score               | 0.0122          | 0.1243        | 0.10          | 0.9222            |
| MDD core score without anhedonia                | -0.0293         | 0.0253        | -1.16         | 0.2485            |
| CDI-C anhedonia T-score                         | 0.0008          | 0.0059        | 0.13          | 0.8930            |
| Baseline anhedonia severity score X Age at scan | -0.0302         | 0.0212        | -1.43         | 0.1574            |
| MDD core score without anhedonia X Age at scan  | -0.0007         | 0.0151        | -0.05         | 0.9639            |
| <b>CDI-C anhedonia T-score X Age at scan</b>    | <b>-0.0125</b>  | <b>0.0036</b> | <b>-3.44</b>  | <b>0.0007</b>     |
| <hr/>                                           |                 |               |               |                   |
| <b>DV: OFC Thickness (mm)</b>                   | <b>Estimate</b> | <b>SE</b>     | <b>t</b>      | <b>p</b>          |
| Intercept                                       | 10.8865         | 0.0516        | 211.20        | <0.0001           |
| <b>Age at scan</b>                              | <b>-0.1499</b>  | <b>0.0096</b> | <b>-15.57</b> | <b>&lt;0.0001</b> |
| <b>Age at scan squared</b>                      | <b>-0.0114</b>  | <b>0.0039</b> | <b>-2.93</b>  | <b>0.0040</b>     |
| Male gender                                     | 0.0498          | 0.0661        | 0.75          | 0.4520            |
| Baseline anhedonia severity score               | 0.0292          | 0.0276        | 1.06          | 0.2917            |
| MDD core score without anhedonia                | -0.0105         | 0.0089        | -1.18         | 0.2383            |
| CDI-C anhedonia T-score                         | 0.0013          | 0.0021        | 0.63          | 0.5306            |
| Baseline anhedonia severity score X Age at scan | -0.0078         | 0.0064        | -1.23         | 0.2236            |
| MDD core score without anhedonia X Age at scan  | -0.0074         | 0.0051        | -1.45         | 0.1476            |
| <b>CDI-C anhedonia T-score X Age at scan</b>    | <b>-0.0036</b>  | <b>0.0012</b> | <b>-3.14</b>  | <b>0.0022</b>     |

**TABLE S2. General Linear Models of Relationship between Individual Subject Intercepts and Slopes from Multilevel Linear Models (MLM) of Orbital Frontal Cortex (OFC) Volume Residuals and OFC Thickness by Time-Varying CDI-C Anhedonia and Age of Onset of Alcohol or Marijuana Use (N=135)**

|                                                | Estimate | SE     | t      | p       |
|------------------------------------------------|----------|--------|--------|---------|
| DV: Intercept from MLM of OFC volume residuals |          |        |        |         |
| Intercept                                      | -1.5703  | 1.0214 | -1.54  | 0.1266  |
| Age of marijuana/alcohol onset                 | 0.0933   | 0.0683 | 1.37   | 0.1740  |
| Male gender                                    | -0.3030  | 0.2929 | -1.03  | 0.3028  |
| Caucasian race                                 | 0.4325   | 0.2948 | 1.47   | 0.1447  |
| DV: Slope from MLM of OFC volume residuals     |          |        |        |         |
| Intercept                                      | -0.1236  | 0.0482 | -2.57  | 0.0114  |
| Age of marijuana/alcohol onset                 | 0.0002   | 0.0032 | 0.07   | 0.9415  |
| Male gender                                    | 0.0016   | 0.0138 | 0.12   | 0.9086  |
| Caucasian race                                 | 0.0013   | 0.0139 | 0.10   | 0.9234  |
| DV: Intercept from MLM of OFC thickness        |          |        |        |         |
| Intercept                                      | 10.4984  | 0.2265 | 46.36  | <0.0001 |
| Age of marijuana/alcohol onset                 | 0.0200   | 0.0151 | 1.32   | 0.1881  |
| Male gender                                    | -0.0107  | 0.0649 | -0.16  | 0.8697  |
| Caucasian race                                 | 0.1116   | 0.0654 | 1.71   | 0.0902  |
| DV: Slope from MLM of OFC thickness            |          |        |        |         |
| Intercept                                      | -0.1644  | 0.0055 | -29.81 | <0.0001 |
| Age of marijuana/alcohol onset                 | 0.0005   | 0.0004 | 1.30   | 0.1955  |
| Male gender                                    | 0.0023   | 0.0016 | 1.46   | 0.1474  |
| Caucasian race                                 | 0.0010   | 0.0016 | 0.62   | 0.5347  |

**TABLE S3. Zero-Inflated Poisson Regression Models of Summed Marijuana Use and Alcohol Use ( $\geq 1$  Drink) Frequency Categories by Individual Subject Intercepts and Slopes from Multilevel Linear Models (MLM) of Orbital Frontal Cortex (OFC) Volume Residuals and OFC Thickness by Time-Varying CDI-C Anhedonia (N=135)**

|                                             | Estimate | SE     | t     | p      |
|---------------------------------------------|----------|--------|-------|--------|
| Zero-inflated: marijuana/alcohol abstinence |          |        |       |        |
| Intercept                                   | 7.3181   | 4.5701 | 1.60  | 0.1093 |
| Intercept from MLM of OFC volume residuals  | -0.2403  | 0.2018 | -1.19 | 0.2337 |
| Caucasian race                              | 1.1217   | 0.7136 | 1.57  | 0.1159 |
| Male gender                                 | -0.5157  | 0.6440 | -0.80 | 0.4232 |
| Age at last assessment                      | -0.4982  | 0.2869 | -1.74 | 0.0825 |
| Continuous: frequency of use                |          |        |       |        |
| Intercept                                   | -3.6198  | 2.2906 | -1.58 | 0.1140 |
| Intercept from MLM of OFC volume residuals  | -0.1837  | 0.0681 | -2.70 | 0.0070 |
| Caucasian race                              | -0.0665  | 0.3139 | -0.21 | 0.8322 |
| Male gender                                 | 0.1760   | 0.2975 | 0.59  | 0.5542 |
| Age at last assessment                      | 0.2351   | 0.1403 | 1.68  | 0.0938 |
| Zero-inflated: marijuana/alcohol abstinence |          |        |       |        |
| Intercept                                   | 8.5647   | 4.3483 | 1.97  | 0.0489 |
| Slope from MLM of OFC volume residuals      | 8.0330   | 4.5698 | 1.76  | 0.0788 |
| Caucasian race                              | 0.4597   | 0.6028 | 0.76  | 0.4457 |
| Male gender                                 | -0.1505  | 0.6254 | -0.24 | 0.8098 |
| Age at last assessment                      | -0.5014  | 0.2718 | -1.84 | 0.0651 |
| Continuous: frequency of use                |          |        |       |        |
| Intercept                                   | -3.2931  | 2.2219 | -1.48 | 0.1383 |
| Slope from MLM of OFC volume residuals      | 1.1100   | 1.5322 | 0.72  | 0.4688 |
| Caucasian race                              | -0.4648  | 0.2822 | -1.65 | 0.0995 |
| Male gender                                 | 0.4218   | 0.2851 | 1.48  | 0.1389 |
| Age at last assessment                      | 0.2303   | 0.1344 | 1.71  | 0.0866 |

***(Continued)***

**(TABLE S3 continued)**

|                                             | <b>Estimate</b> | <b>SE</b> | <b>t</b> | <b>p</b> |
|---------------------------------------------|-----------------|-----------|----------|----------|
| Zero-inflated: marijuana/alcohol abstinence |                 |           |          |          |
| Intercept                                   | 15.6567         | 11.4337   | 1.37     | 0.1709   |
| Intercept from MLM of OFC thickness         | -0.8297         | 1.0983    | -0.76    | 0.4500   |
| Caucasian race                              | 0.5345          | 0.7467    | 0.72     | 0.4741   |
| Male gender                                 | -0.7725         | 0.8167    | -0.95    | 0.3442   |
| Age at last assessment                      | -0.4466         | 0.3527    | -1.27    | 0.2055   |
| Continuous: frequency of use                |                 |           |          |          |
| Intercept                                   | 9.4339          | 4.0998    | 2.30     | 0.0214   |
| Intercept from MLM of OFC thickness         | -1.3128         | 0.3809    | -3.45    | 0.0006   |
| Caucasian race                              | -0.4220         | 0.2894    | -1.46    | 0.1448   |
| Male gender                                 | 0.1267          | 0.3030    | 0.42     | 0.6759   |
| Age at last assessment                      | 0.3107          | 0.1483    | 2.09     | 0.0362   |
| Zero-inflated: marijuana/alcohol abstinence |                 |           |          |          |
| Intercept                                   | -0.8716         | 14.4247   | -0.06    | 0.9518   |
| Slope from MLM of OFC thickness             | -54.7522        | 83.3655   | -0.66    | 0.5113   |
| Caucasian race                              | 1.1266          | 0.9843    | 1.14     | 0.2524   |
| Male gender                                 | -0.5647         | 0.8693    | -0.65    | 0.5159   |
| Age at last assessment                      | -0.5533         | 0.4241    | -1.30    | 0.1919   |
| Continuous: frequency of use                |                 |           |          |          |
| Intercept                                   | -13.9348        | 4.5380    | -3.07    | 0.0021   |
| Slope from MLM of OFC thickness             | -58.7356        | 18.1782   | -3.23    | 0.0012   |
| Caucasian race                              | -0.2284         | 0.2742    | -0.83    | 0.4049   |
| Male gender                                 | 0.2648          | 0.3145    | 0.84     | 0.3999   |
| Age at last assessment                      | 0.2963          | 0.1600    | 1.85     | 0.0640   |

**TABLE S4. Zero-Inflated Poisson Regression Models of Summed Marijuana Use and Alcohol Use (Intoxication) Frequency Categories by Individual Subject Intercepts and Slopes from Multilevel Linear Models (MLM) of Orbital Frontal Cortex (OFC) Volume Residuals and OFC Thickness by Time-Varying CDI-C Anhedonia (N=135)**

|                                             | Estimate | SE     | t     | p      |
|---------------------------------------------|----------|--------|-------|--------|
| Zero-inflated: marijuana/alcohol abstinence |          |        |       |        |
| Intercept                                   | 6.2264   | 5.2485 | 1.19  | 0.2355 |
| Intercept from MLM of OFC volume residuals  | -0.2982  | 0.2155 | -1.38 | 0.1664 |
| Caucasian race                              | 1.2873   | 0.8442 | 1.52  | 0.1273 |
| Male gender                                 | -0.5439  | 0.7354 | -0.74 | 0.4596 |
| Age at last assessment                      | -0.4471  | 0.3281 | -1.36 | 0.1730 |
| Continuous: frequency of use                |          |        |       |        |
| Intercept                                   | -4.5683  | 2.4259 | -1.88 | 0.0597 |
| Intercept from MLM of OFC volume residuals  | -0.2034  | 0.0688 | -2.95 | 0.0031 |
| Caucasian race                              | -0.0582  | 0.3288 | -0.18 | 0.8595 |
| Male gender                                 | 0.1809   | 0.3142 | 0.58  | 0.5647 |
| Age at last assessment                      | 0.2856   | 0.1485 | 1.92  | 0.0545 |
| Zero-inflated: marijuana/alcohol abstinence |          |        |       |        |
| Intercept                                   | 7.7063   | 4.8414 | 1.59  | 0.1114 |
| Slope from MLM of OFC volume residuals      | 8.4115   | 4.9894 | 1.69  | 0.0918 |
| Caucasian race                              | 0.3857   | 0.6794 | 0.57  | 0.5702 |
| Male gender                                 | -0.0475  | 0.7172 | -0.07 | 0.9472 |
| Age at last assessment                      | -0.4569  | 0.3031 | -1.51 | 0.1317 |
| Continuous: frequency of use                |          |        |       |        |
| Intercept                                   | -4.2438  | 2.3730 | -1.79 | 0.0737 |
| Slope from MLM of OFC volume residuals      | 0.7926   | 1.5946 | 0.50  | 0.6191 |
| Caucasian race                              | -0.5187  | 0.2969 | -1.75 | 0.0806 |
| Male gender                                 | 0.4690   | 0.3019 | 1.55  | 0.1203 |
| Age at last assessment                      | 0.2790   | 0.1428 | 1.95  | 0.0508 |

***(Continued)***

**(TABLE S4 continued)**

|                                             | <b>Estimate</b> | <b>SE</b> | <b>t</b> | <b>p</b> |
|---------------------------------------------|-----------------|-----------|----------|----------|
| Zero-inflated: marijuana/alcohol abstinence |                 |           |          |          |
| Intercept                                   | 19.7539         | 12.6272   | 1.56     | 0.1177   |
| Intercept from MLM of OFC thickness         | -1.4138         | 1.2673    | -1.12    | 0.2646   |
| Caucasian race                              | 0.6041          | 0.9302    | 0.65     | 0.5160   |
| Male gender                                 | -1.0446         | 1.0583    | -0.99    | 0.3236   |
| Age at last assessment                      | -0.3236         | 0.4322    | -0.75    | 0.4540   |
| Continuous: frequency of use                |                 |           |          |          |
| Intercept                                   | 10.1336         | 4.1581    | 2.44     | 0.0148   |
| Intercept from MLM of OFC thickness         | -1.4960         | 0.3583    | -4.18    | <0.0001  |
| Caucasian race                              | -0.4633         | 0.2946    | -1.57    | 0.1158   |
| Male gender                                 | 0.1088          | 0.3151    | 0.35     | 0.7299   |
| Age at last assessment                      | 0.3821          | 0.1527    | 2.50     | 0.0123   |
| Zero-inflated: marijuana/alcohol abstinence |                 |           |          |          |
| Intercept                                   | -1531.923       | 22.2912   | -68.72   | <0.0001  |
| Slope from MLM of OFC thickness             | -13209          | 7.8829    | -1675.6  | <0.0001  |
| Caucasian race                              | 187.2070        | 374.8997  | 0.50     | 0.6175   |
| Male gender                                 | 30.4853         | 78.8427   | 0.39     | 0.6990   |
| Age at last assessment                      | -54.5973        | 25.1266   | -2.17    | 0.0298   |
| Continuous: frequency of use                |                 |           |          |          |
| Intercept                                   | -18.0471        | 2.7392    | -6.59    | <0.0001  |
| Slope from MLM of OFC thickness             | -68.1939        | 13.0628   | -5.22    | <0.0001  |
| Caucasian race                              | -0.4292         | 0.2200    | -1.95    | 0.0511   |
| Male gender                                 | 0.4715          | 0.2178    | 2.16     | 0.0304   |
| Age at last assessment                      | 0.4354          | 0.1092    | 3.99     | <0.0001  |

**TABLE S5. Zero-Inflated Poisson Regression Models of Summed Marijuana Use and Alcohol Use ( $\geq 5$  Drinks) Frequency Categories by Individual Subject Intercepts and Slopes from Multilevel Linear Models (MLM) of Orbital Frontal Cortex (OFC) Volume Residuals and OFC Thickness by Gender and Age at Scan (N=135)**

|                                             | Estimate  | SE      | t       | p       |
|---------------------------------------------|-----------|---------|---------|---------|
| Zero-inflated: marijuana/alcohol abstinence |           |         |         |         |
| Intercept                                   | 6004.6465 | 1.3440  | 4467.63 | <0.0001 |
| Intercept from MLM of OFC volume residuals  | 101.8468  | 59.5607 | 1.71    | 0.0873  |
| Caucasian race                              | 1637.1016 | 0.5137  | 3186.78 | <0.0001 |
| Male gender                                 | -1015.944 | 0.1402  | -7247.1 | <0.0001 |
| Age at last assessment                      | -412.2505 | 6.9031  | -59.72  | <0.0001 |
| Continuous: frequency of use                |           |         |         |         |
| Intercept                                   | -4.3161   | 2.7611  | -1.56   | 0.1180  |
| Intercept from MLM of OFC volume residuals  | -0.2052   | 0.0992  | -2.07   | 0.0386  |
| Caucasian race                              | -0.5163   | 0.4334  | -1.19   | 0.2335  |
| Male gender                                 | 0.2823    | 0.3620  | 0.78    | 0.4355  |
| Age at last assessment                      | 0.2131    | 0.1671  | 1.28    | 0.2022  |
| Zero-inflated: marijuana/alcohol abstinence |           |         |         |         |
| Intercept                                   | 48.9189   | 24.3465 | 2.01    | 0.0445  |
| Slope from MLM of OFC volume residuals      | -45.1625  | 24.8531 | -1.82   | 0.0692  |
| Caucasian race                              | 37.0511   | 1.6560  | 22.37   | <0.0001 |
| Male gender                                 | -30.1093  | 1.6633  | -18.10  | <0.0001 |
| Age at last assessment                      | -3.7158   | 1.8161  | -2.05   | 0.0408  |
| Continuous: frequency of use                |           |         |         |         |
| Intercept                                   | -3.9511   | 3.2599  | -1.21   | 0.2255  |
| Slope from MLM of OFC volume residuals      | -4.8356   | 1.9194  | -2.52   | 0.0118  |
| Caucasian race                              | 0.1433    | 0.5682  | 0.25    | 0.8008  |
| Male gender                                 | 0.1243    | 0.3906  | 0.32    | 0.7503  |
| Age at last assessment                      | 0.1698    | 0.1981  | 0.86    | 0.3914  |

***(Continued)***



**(TABLE S5 continued)**

|                                             | <b>Estimate</b> | <b>SE</b> | <b>t</b> | <b>p</b> |
|---------------------------------------------|-----------------|-----------|----------|----------|
| Zero-inflated: marijuana/alcohol abstinence |                 |           |          |          |
| Intercept                                   | -338.1297       | 60.5102   | -5.59    | <0.0001  |
| Intercept from MLM of OFC thickness         | 639.6419        | 638.5777  | 1.00     | 0.3165   |
| Caucasian race                              | 695.3749        | 462.4330  | 1.50     | 0.1327   |
| Male gender                                 | -721.8514       | 427.7706  | -1.69    | 0.0915   |
| Age at last assessment                      | -422.5340       | 445.7912  | -0.95    | 0.3432   |
| Continuous: frequency of use                |                 |           |          |          |
| Intercept                                   | 6.8272          | 4.9064    | 1.39     | 0.1641   |
| Intercept from MLM of OFC thickness         | -1.0804         | 0.4528    | -2.39    | 0.0170   |
| Caucasian race                              | -0.9892         | 0.4319    | -2.29    | 0.0220   |
| Male gender                                 | 0.4492          | 0.3681    | 1.22     | 0.2223   |
| Age at last assessment                      | 0.2478          | 0.1856    | 1.34     | 0.1818   |
| Zero-inflated: marijuana/alcohol abstinence |                 |           |          |          |
| Intercept                                   | -2.5635         | 14.4445   | -0.18    | 0.8591   |
| Slope from MLM of OFC thickness             | -255.9680       | 123.4695  | -2.07    | 0.0382   |
| Caucasian race                              | 10.1565         | 4.0780    | 2.49     | 0.0128   |
| Male gender                                 | -2.1831         | 2.5008    | -0.87    | 0.3827   |
| Age at last assessment                      | -2.7153         | 1.3735    | -1.98    | 0.0481   |
| Continuous: frequency of use                |                 |           |          |          |
| Intercept                                   | -17.4777        | 4.4291    | -3.95    | <0.0001  |
| Slope from MLM of OFC thickness             | -82.0076        | 19.3728   | -4.23    | <0.0001  |
| Caucasian race                              | 0.0559          | 0.5847    | 0.10     | 0.9238   |
| Male gender                                 | 0.5753          | 0.3968    | 1.45     | 0.1471   |
| Age at last assessment                      | 0.2233          | 0.2027    | 1.10     | 0.2706   |

**FIGURE S1. Individual Subject Intercepts and Slopes from Multilevel Models of Orbital Frontal Cortex (OFC) Volume Residuals and OFC Thickness by Time-Varying CDI-C Anhedonia T-Score by Marijuana and Alcohol ( $\geq 5$  Drinks) Frequency Category (N=135)**

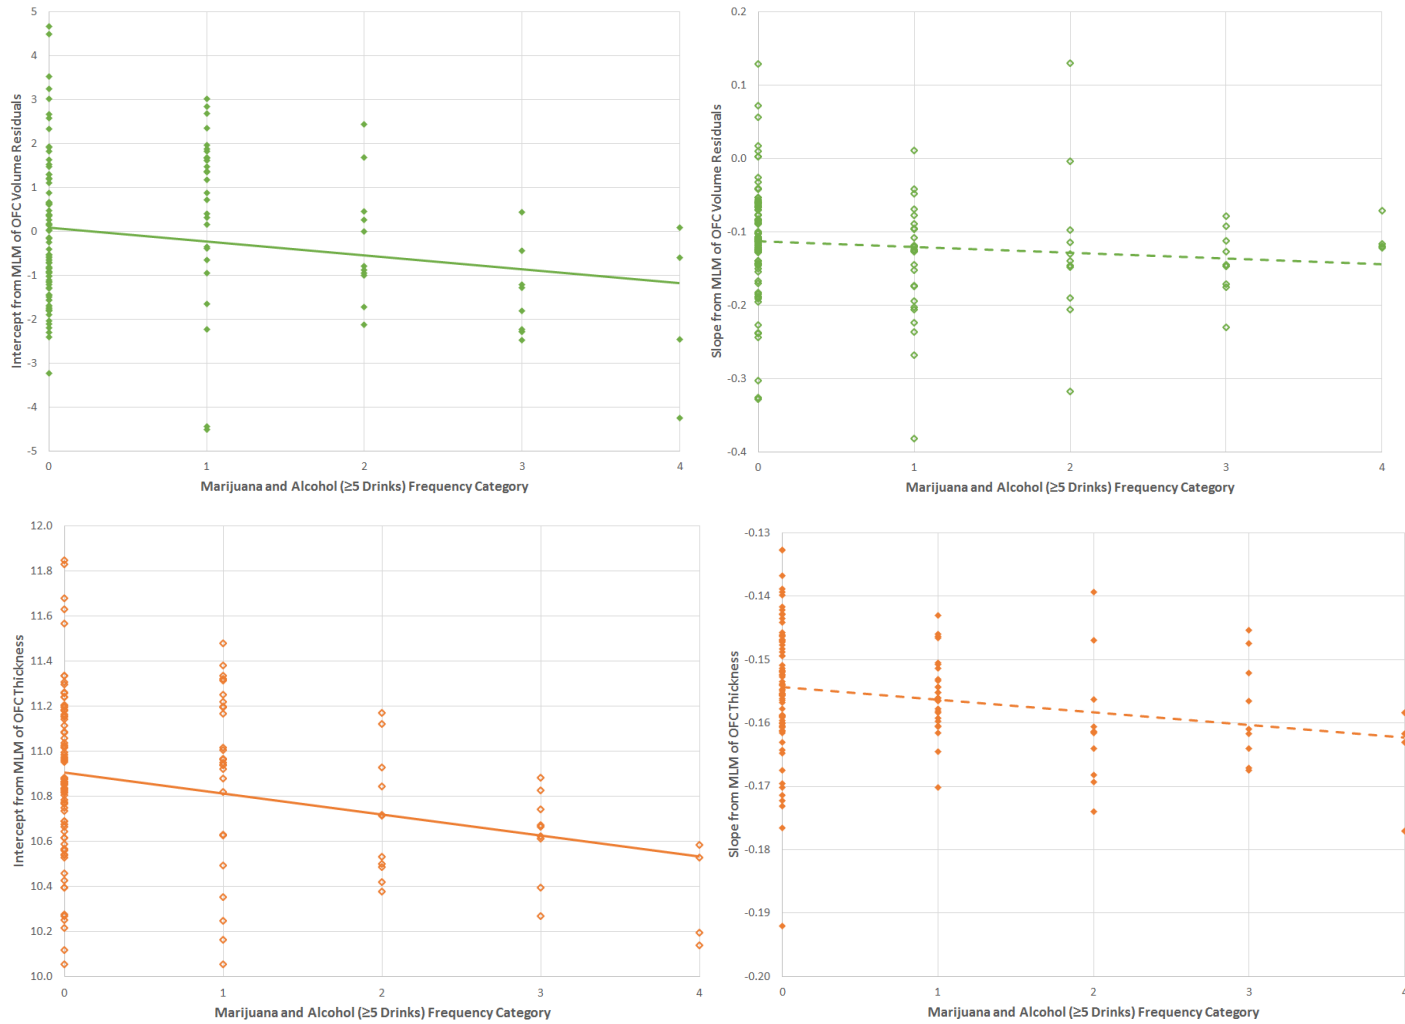

Supplement: appi.ajp.2018.17070777.ds001.pdf [file appi.ajp.2018.17070777.ds001.pdf]
